# Supplementary material for: Developing a Model for Quantifying QTc-Prolongation Risk to Enhance Medication Safety Assessment: A Retrospective Analysis
Source: MDPI journal article supplement (doi:10.3390/jpm14020172), 2024-01-31
Supplement: s1 [file s1]

# Developing a model for quantifying QTc prolongation risk to enhance medication safety assessment: a retrospective analysis

Luis Giovannoni, Gerd A. Kullak-Ublick and Alexander Jetter

## Supplementary information

**Table S1:** Influence of individual parameters on QTc-time under medication.

The selection of tests was based on the nature of the data. Results of both parametric and nonparametric tests are given. Values which were included in the initial modelling are highlighted.

| parameter                          | test       | test-value | p-value | test            | test-value  | p-value |
|------------------------------------|------------|------------|---------|-----------------|-------------|---------|
| Age (years)                        | regression | r= -0.143  | 0.142   | Spearman's rank | rho= -0.180 | 0.063   |
| Sex                                | t-test     | T= 0.973   | 0.333   | Mann-Whitney-U  | U= 1158.5   | 0.278   |
| Hospitalization in the ICU         | t-test     | T= 0.630   | 0.530   | Mann-Whitney-U  | U= 1274     | 0.613   |
| Postoperative ECG                  | t-test     | T= -0.195  | 0.846   | Mann-Whitney-U  | U= 931      | 0.975   |
| Ischemic heart disease             | t-test     | T= -1.715  | 0.089   | Mann-Whitney-U  | U= 839.5    | 0.121   |
| Acute myocardial infarction        | t-test     | T= -1.114  | 0.268   | Mann-Whitney-U  | U= 247      | 0.448   |
| Chronic heart failure              | t-test     | T= -1.806  | 0.074   | Mann-Whitney-U  | U= 765.5    | 0.085   |
| LVEF (%)                           | regression | r= -0.141  | 0.328   | Spearman's rank | rho= -0.178 | 0.217   |
| Diabetes mellitus type II          | t-test     | T= -2.058  | 0.042   | Mann-Whitney-U  | U= 506      | 0.027   |
| HbA 1c (%)                         | regression | r= 0.079   | 0.739   | Spearman's rank | rho= -0.059 | 0.805   |
| Sepsis                             | t-test     | T= 0.684   | 0.495   | Mann-Whitney-U  | U= 520.5    | 0.388   |
| SOFA-score                         | regression | r= -0.178  | 0.348   | Spearman's rank | rho= -0.139 | 0.465   |
| Liver failure                      | t-test     | T= 0.942   | 0.348   | Mann-Whitney-U  | U= 356      | 0.340   |
| MELD-score                         | regression | r= -0.021  | 0.954   | Spearman's rank | rho= -0.422 | 0.224   |
| Arrhythmia                         | t-test     | T= -1.227  | 0.223   | Mann-Whitney-U  | U= 1269.5   | 0.461   |
| Structural heart disease           | t-test     | T= -0.602  | 0.548   | Mann-Whitney-U  | U= 394      | 0.598   |
| Hypertension                       | t-test     | T= 0.661   | 0.510   | Mann-Whitney-U  | U= 1135     | 0.478   |
| Potassium (mmol/L)                 | regression | r= 0.096   | 0.327   | Spearman's rank | rho= 0.064  | 0.512   |
| Calcium (mmol/L)                   | regression | r= -0.088  | 0.462   | Spearman's rank | rho= -0.021 | 0.858   |
| Mg (mmol/L)                        | regression | r= 0.041   | 0.715   | Spearman's rank | rho= 0.046  | 0.683   |
| eGFR (ml/min/1.73 m <sup>2</sup> ) | regression | r= 0.034   | 0.731   | Spearman's rank | rho= 0.046  | 0.638   |

|                    |            |           |       |                 |            |       |
|--------------------|------------|-----------|-------|-----------------|------------|-------|
| TSH (mU/L)         | regression | r= 0.000  | 0.998 | Spearman's rank | rho= 0.105 | 0.385 |
| Loop diuretics     | t-test     | T= -1.732 | 0.086 | Mann-Whitney-U  | U= 1153    | 0.176 |
| Antiarrhythmics    | t-test     | T= -2.106 | 0.038 | Mann-Whitney-U  | U= 996.5   | 0.102 |
| Antihypertensives  | t-test     | T= 0.410  | 0.682 | Mann-Whitney-U  | U= 1380    | 0.779 |
| Initial QTc (msec) | regression | r= 0.291  | 0.005 | Spearman's rank | rho= 0.324 | 0.002 |
| KR drugs           | ANOVA      | F= 1.030  | 0.404 | Kruskal-Wallis  | H= 4.424   | 0.490 |
| PR drugs           | ANOVA      | F= 1.231  | 0.302 | Kruskal-Wallis  | H= 3.211   | 0.360 |
| KR+PR drugs        | ANOVA      | F= 0.428  | 0.828 | Kruskal-Wallis  | H= 2.592   | 0.763 |

**Table S2:** Influence of individual parameters on QTc-prolongation under medication ( $\Delta$ QTc). The selection of tests was based on the nature of the data. Results of both parametric and nonparametric tests are given. Values which were included in the initial modelling are highlighted.

| parameter                          | test       | test-value | p-value | test            | test-value  | p-value |
|------------------------------------|------------|------------|---------|-----------------|-------------|---------|
| Age (years)                        | regression | r= -0.081  | 0.440   | Spearman's rank | rho= -0.108 | 0.301   |
| Sex                                | t-test     | T= 0.747   | 0.457   | Mann-Whitney-U  | U= 896      | 0.518   |
| Hospitalization in the ICU         | t-test     | T= 0.039   | 0.969   | Mann-Whitney-U  | U= 991      | 0.629   |
| Postoperative ECG                  | t-test     | T= 1.117   | 0.267   | Mann-Whitney-U  | U= 610.5    | 0.530   |
| Ischemic heart disease             | t-test     | T= -1.127  | 0.263   | Mann-Whitney-U  | U= 658      | 0.266   |
| Acute myocardial infarction        | t-test     | T= -0.710  | 0.479   | Mann-Whitney-U  | U= 167      | 0.367   |
| Chronic heart failure              | t-test     | T= -0.212  | 0.833   | Mann-Whitney-U  | U= 732      | 0.825   |
| LVEF (%)                           | regression | r= 0.092   | 0.550   | Spearman's rank | rho= 0.048  | 0.756   |
| Diabetes mellitus type II          | t-test     | T= 0.253   | 0.801   | Mann-Whitney-U  | U= 558.5    | 0.782   |
| HbA 1c (%)                         | regression | r= 0.043   | 0.861   | Spearman's rank | rho= 0.210  | 0.389   |
| Sepsis                             | t-test     | T= 0.039   | 0.969   | Mann-Whitney-U  | U= 434      | 0.551   |
| SOFA-score                         | regression | r= -0.116  | 0.548   | Spearman's rank | rho= -0.072 | 0.709   |
| Liver failure                      | t-test     | T= 0.380   | 0.705   | Mann-Whitney-U  | U= 364.5    | 0.861   |
| MELD-score                         | regression | r= -0.614  | 0.059   | Spearman's rank | rho= -0.817 | 0.004   |
| Arrhythmia                         | t-test     | T= -2.957  | 0.004   | Mann-Whitney-U  | U= 642.5    | 0.002   |
| Structural heart disease           | t-test     | T= 1.904   | 0.060   | Mann-Whitney-U  | U= 167      | 0.018   |
| Hypertension                       | t-test     | T= -1.565  | 0.121   | Mann-Whitney-U  | U= 781.5    | 0.282   |
| Potassium (mmol/L)                 | regression | r= -0.079  | 0.165   | Spearman's rank | rho= 0.005  | 0.966   |
| Calcium (mmol/L)                   | regression | r= 0.165   | 0.182   | Spearman's rank | rho= 0.138  | 0.264   |
| Mg (mmol/L)                        | regression | r= -0.091  | 0.439   | Spearman's rank | rho= -0.056 | 0.638   |
| eGFR (ml/min/1.73 m <sup>2</sup> ) | regression | r= 0.130   | 0.214   | Spearman's rank | rho= 0.105  | 0.317   |
| TSH (mU/L)                         | regression | r= -0.110  | 0.391   | Spearman's rank | rho= -0.033 | 0.798   |
| Loop diuretics                     | t-test     | T= -0.978  | 0.331   | Mann-Whitney-U  | U= 886      | 0.239   |
| Antiarrhythmics                    | t-test     | T= -2.174  | 0.032   | Mann-Whitney-U  | U= 587.5    | 0.005   |
| Antihypertensives                  | t-test     | T= -1.203  | 0.232   | Mann-Whitney-U  | U= 969.5    | 0.404   |

|                    |            |           |        |                 |             |        |
|--------------------|------------|-----------|--------|-----------------|-------------|--------|
| Initial QTc (msec) | regression | r= -0.609 | <0.001 | Spearman's rank | rho= -0.585 | <0.001 |
| KR drugs           | ANOVA      | F= 1.291  | 0.275  | Kruskal-Wallis  | H= 5.949    | 0.311  |
| PR drugs           | ANOVA      | F= 0.288  | 0.834  | Kruskal-Wallis  | H= 0.988    | 0.804  |
| KR+PR drugs        | ANOVA      | F= 0.929  | 0.466  | Kruskal-Wallis  | H= 5.235    | 0.388  |
